# Supplementary material for: Active biodegradable packaging films modified with grape seeds lignin
Source: Royal Society of Chemistry journal article supplement (doi:10.1039/d0ra04074f), 2020-01-01
Supplement: d0ra04074f1.pdf [file d0ra04074f1.pdf]

Supporting Information

**Active biodegradable packaging films modified with grape seeds lignin**

Pavel Vostrejs,<sup>a</sup> Dana Adamcová,<sup>b</sup> Magdalena Daria Vaverková,<sup>b,c</sup> Vojtech Enev,<sup>d</sup> Michal Kalina,<sup>d</sup> Michal Machovsky,<sup>e</sup>  
Markéta Šourková,<sup>b</sup> Ivana Marova<sup>a</sup> and Adriana Kovalcik <sup>\*a</sup>

**Composting test**

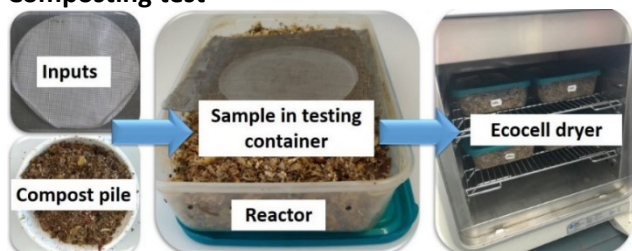

Fig. S1. PHB and PHB/PHA films placed inside the compost reactor.

**Phytotoxicity experiment**

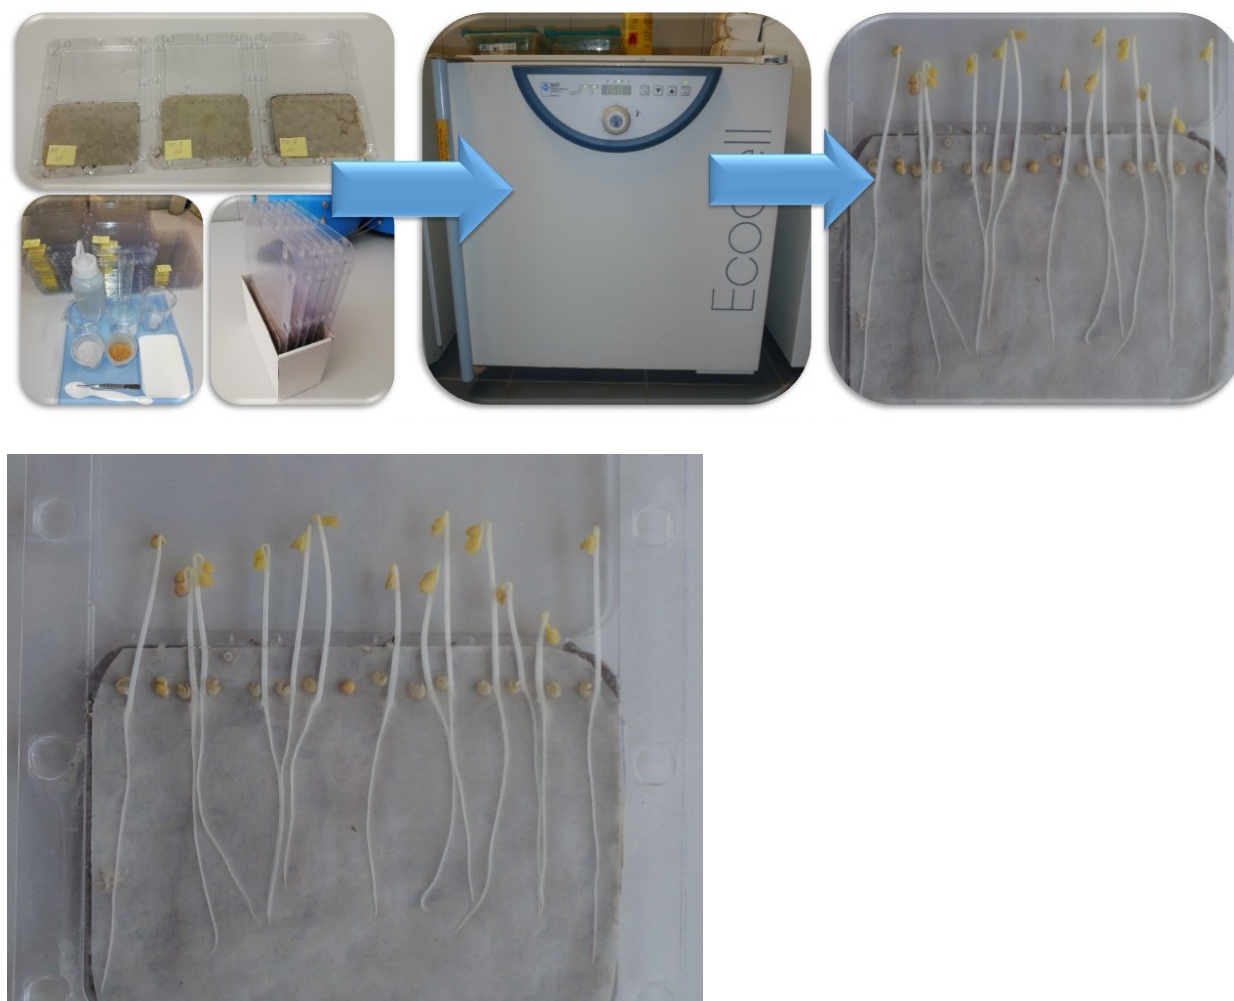

Fig. S2. Design of Phytotoxkit Test.

## Results

### Properties of grape seeds lignin, Size Exclusion Chromatography

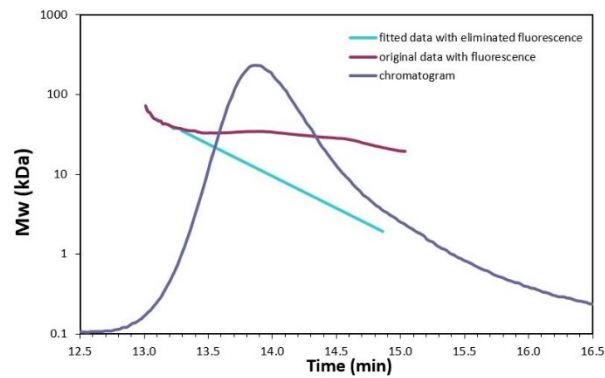

Fig. S3. SEC chromatogram of acetylated grape seeds lignin.

### Monitoring of biodegradation of PHB/PHA films in compost

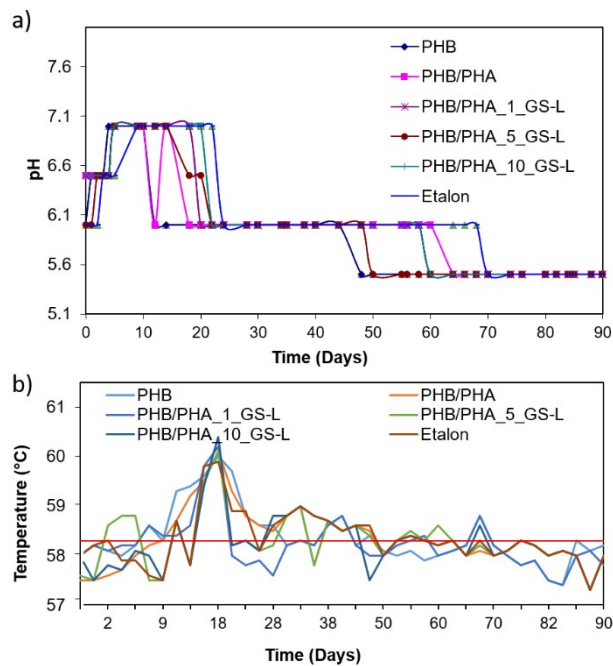

Fig. S4. Monitoring of (a) pH and (b) temperature variations with respect to time during the composting period.

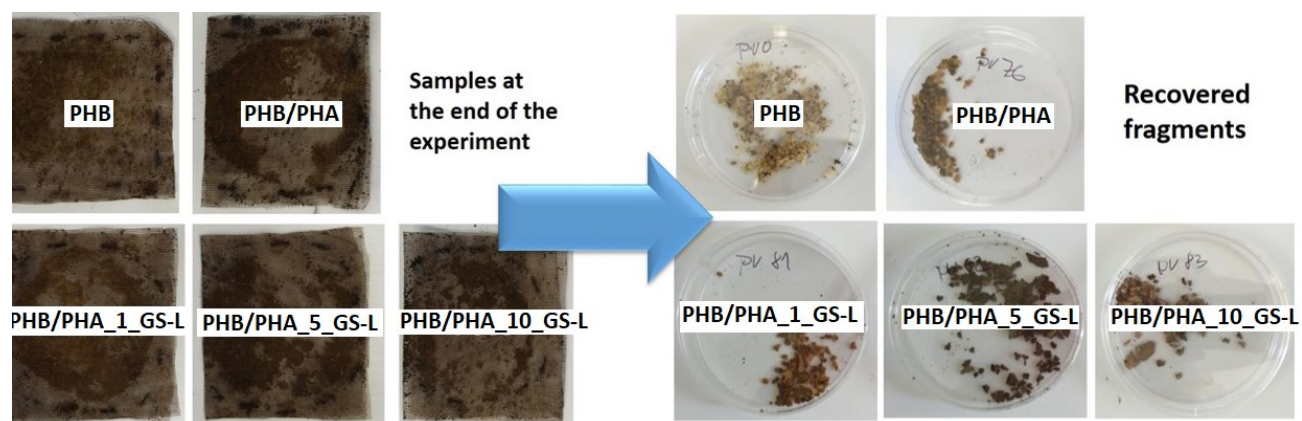

Fig. S5. Photographs of the recovered fragments of films at the end of the composting experiment.
